# Supplementary material
Source: publisher figshare collection journal article supplement (https://gsapubs.figshare.com/articles/dataset/_/23154341)
Supplement: Supplementary file 1 [file 1]

Zhuang, L., Song, Y., Leach, D., Liu, Y., Hou, Z., and Fard, M., 2023, Vanished evaporites, halokinetic structure, and Zn-Pb mineralization in the world-class Angouran deposit, northwestern Iran: GSA Bulletin, <https://doi.org/10.1130/B36910.1>.

## Supplemental Material

**Figure S1.** (A) Raman spectra of anhydrite and dolomite inclusions in S1 sphalerite. (B) Raman spectra of dolomite and spherical calcite inclusions in double-terminated quartz. (C) Raman spectra of tabular dolomite inclusion and the host double-terminated quartz.

**Figure S2.** Concentrations of Li, Na, and K vs. Al of the double-terminated quartz at Angouran.

**Table S1.** U-Pb data of zircons from Miocene tuffaceous pyroclastic rocks and volcanic clasts-bearing breccias in the Angouran deposit.

**Table S2.** Sulfur isotope composition of sulfides in the Angouran deposit.

**Table S3.** Quantitative LA-ICP-MS trace element data of double-terminated quartz in the Angouran deposit (concentrations in ppm).

**Table S4.** Oxygen isotope composition of quartz from the sulfide ores and footwall schist in the Angouran deposit.

## Supplementary Material

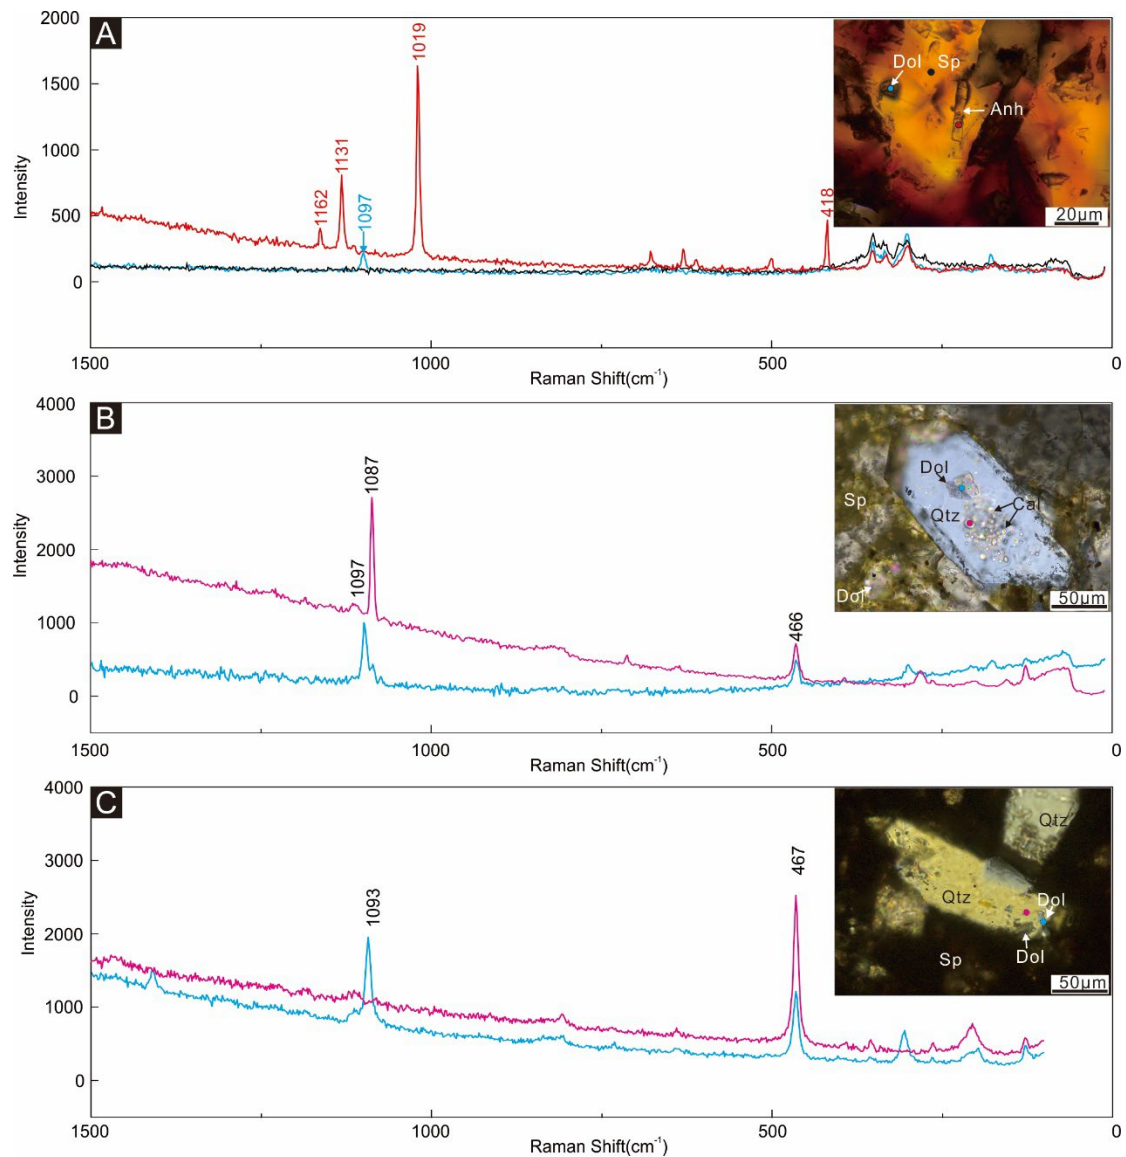

**Figure S1.** (A) Raman spectra of anhydrite and dolomite inclusions in S1 sphalerite. (B) Raman spectra of dolomite and spherical calcite inclusions in double-terminated quartz. (C) Raman spectra of tabular dolomite inclusion and the host double-terminated quartz. Abbreviations: Anh = anhydrite, Cal = calcite, Dol= dolomite, Gn= galena, Qtz = quartz, Sp = sphalerite

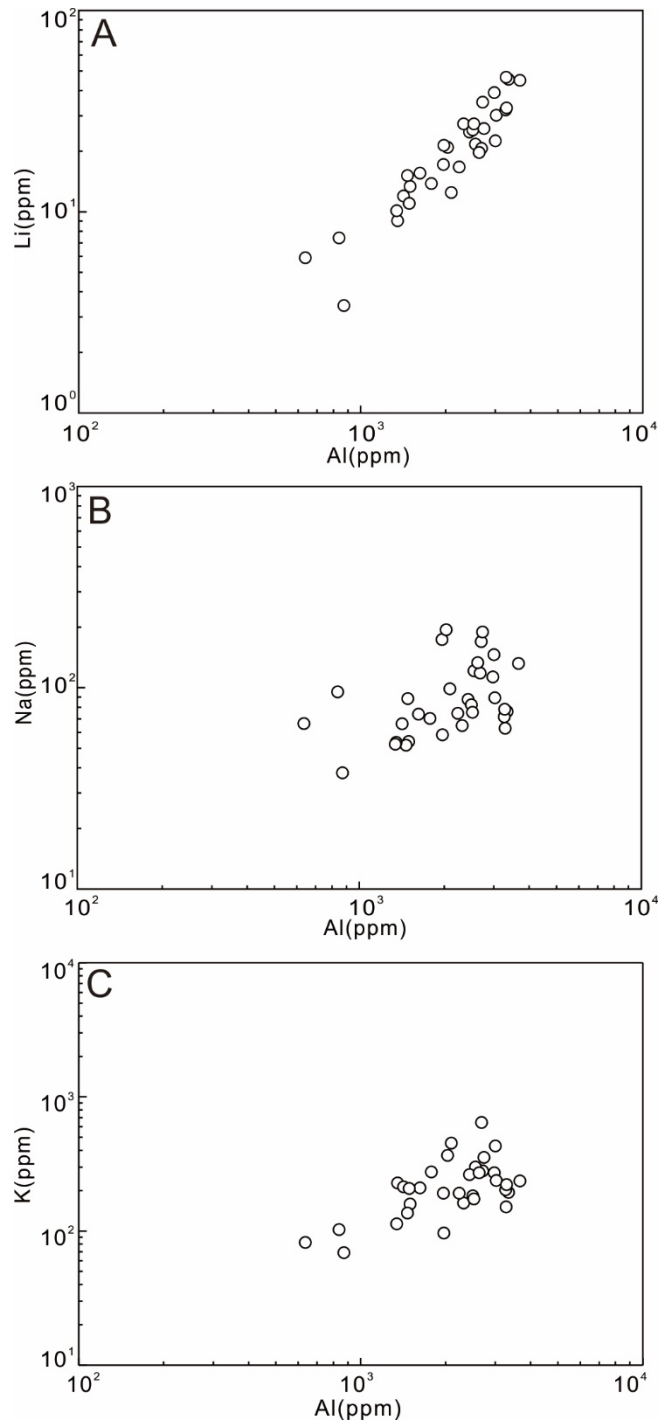

**Figure S2.** Concentrations of Li, Na, and K vs. Al of the double-terminated quartz at Angouran. The positive correlations suggest that Li, Na, K can be incorporated in quartz crystals by substitution for silica on a tetrahedral site:  $\text{Si}^{4+} \leftrightarrow (\text{Li}, \text{Na}, \text{K})^{++} \text{Al}^{3+}$ .
